# Supplementary material for: Choosing a density functional for modeling adsorptive hydrogen storage: reference quantum mechanical calculations and a comparison of dispersion-corrected density functionals
Source: Royal Society of Chemistry journal article supplement (doi:10.1039/c4cp04354e), 2015-01-01
Supplement: c4cp04354e1.pdf [file c4cp04354e1.pdf]

## Supporting Information

### Choosing a Density Functional for Modeling Adsorptive Hydrogen Storage: Reference Quantum Mechanical Calculations and a Comparison of Dispersion-Corrected Density Functionals

Mikuláš Kocman, Petr Jurečka, Matúš Dubecký, Michal Otyepka, Yeonchoo Cho,  
Kwang S. Kim

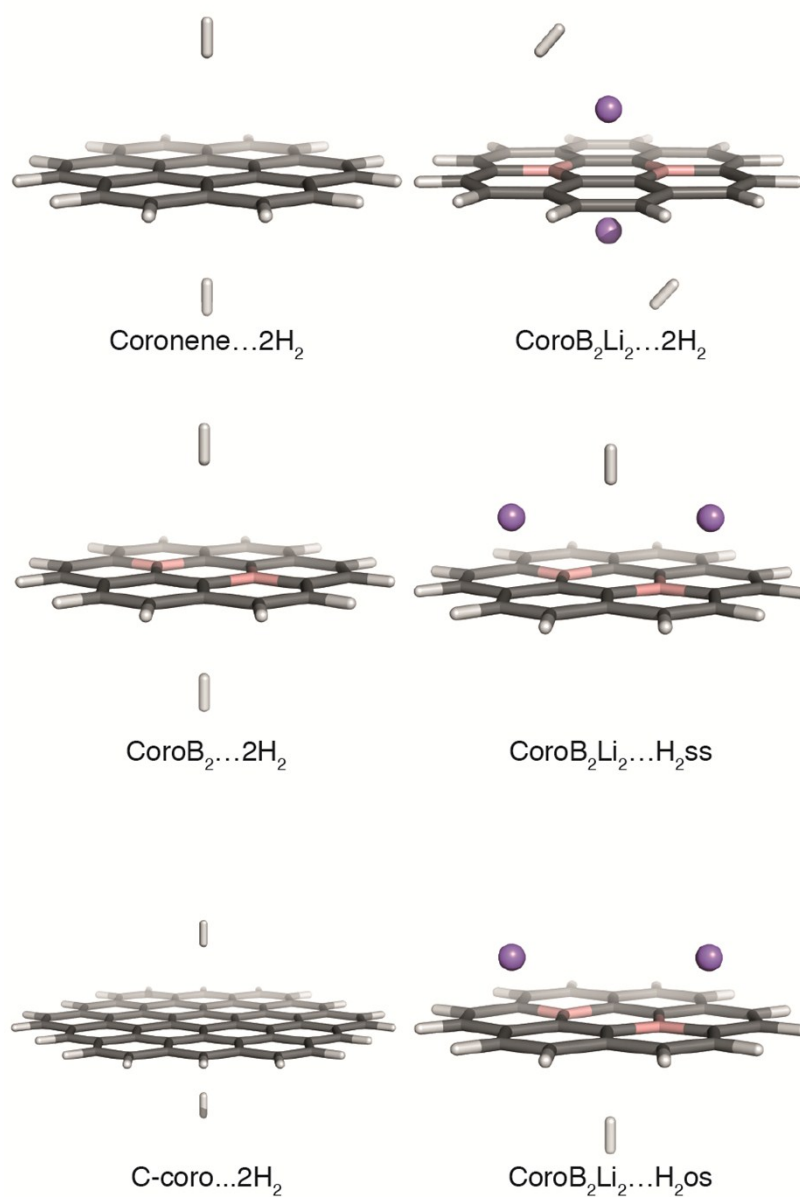

Coronene...2H<sub>2</sub>

|   |            |            |            |
|---|------------|------------|------------|
| C | -1.2346511 | -0.7128261 | 0.0000000  |
| C | -1.2346511 | 0.7128261  | 0.0000000  |
| C | 0.0000000  | 1.4256523  | 0.0000000  |
| C | 1.2346511  | 0.7128261  | 0.0000000  |
| C | 1.2346511  | -0.7128261 | 0.0000000  |
| C | 0.0000000  | -1.4256523 | 0.0000000  |
| C | -2.4670697 | 1.4244034  | 0.0000000  |
| C | 0.0000000  | 2.8487267  | 0.0000000  |
| C | -1.2469441 | 3.5331924  | 0.0000000  |
| C | -2.4403623 | 2.8464814  | 0.0000000  |
| C | -2.4670697 | -1.4244034 | 0.0000000  |
| C | -3.6833064 | -0.6867110 | 0.0000000  |
| C | -3.6833064 | 0.6867110  | 0.0000000  |
| C | -2.4403623 | -2.8464814 | 0.0000000  |
| C | -1.2469441 | -3.5331924 | 0.0000000  |
| C | 0.0000000  | -2.8487267 | 0.0000000  |
| C | 1.2469441  | -3.5331924 | 0.0000000  |
| C | 2.4403623  | -2.8464814 | 0.0000000  |
| C | 2.4670697  | -1.4244034 | 0.0000000  |
| C | 3.6833064  | -0.6867110 | 0.0000000  |
| C | 3.6833064  | 0.6867110  | 0.0000000  |
| C | 2.4670697  | 1.4244034  | 0.0000000  |
| C | 2.4403623  | 2.8464814  | 0.0000000  |
| C | 1.2469441  | 3.5331924  | 0.0000000  |
| H | -1.2440968 | 4.6195959  | 0.0000000  |
| H | -3.3786390 | 3.3872174  | 0.0000000  |
| H | -4.6227358 | -1.2323785 | 0.0000000  |
| H | -4.6227358 | 1.2323785  | 0.0000000  |
| H | -3.3786390 | -3.3872174 | 0.0000000  |
| H | -1.2440968 | -4.6195959 | 0.0000000  |
| H | 1.2440968  | -4.6195959 | 0.0000000  |
| H | 3.3786390  | -3.3872174 | 0.0000000  |
| H | 4.6227358  | -1.2323785 | 0.0000000  |
| H | 4.6227358  | 1.2323785  | 0.0000000  |
| H | 3.3786390  | 3.3872174  | 0.0000000  |
| H | 1.2440968  | 4.6195959  | 0.0000000  |
| H | 0.0000000  | 0.0000000  | 3.4710000  |
| H | 0.0000000  | 0.0000000  | 2.7290000  |
| H | 0.0000000  | 0.0000000  | -2.7290000 |
| H | 0.0000000  | 0.0000000  | -3.4710000 |

CoroB<sub>2</sub>...2H<sub>2</sub>

|   |            |            |            |
|---|------------|------------|------------|
| B | -1.5875542 | 0.0000000  | 0.0000000  |
| C | -0.6762146 | 0.0000000  | -1.2524544 |
| C | 0.6762146  | 0.0000000  | -1.2524544 |
| B | 1.5875542  | 0.0000000  | 0.0000000  |
| C | 0.6762146  | 0.0000000  | 1.2524544  |
| C | -0.6762146 | 0.0000000  | 1.2524544  |
| C | -1.4952689 | 0.0000000  | 2.4412557  |
| C | -2.9141535 | 0.0000000  | 2.4308574  |
| C | -3.6823871 | 0.0000000  | 1.2802070  |
| C | -3.0552729 | 0.0000000  | 0.0000000  |
| C | -3.6823871 | 0.0000000  | -1.2802070 |
| C | -2.9141535 | 0.0000000  | -2.4308574 |
| C | -1.4952689 | 0.0000000  | -2.4412557 |
| C | -0.6831736 | 0.0000000  | -3.6269340 |
| C | 0.6831736  | 0.0000000  | -3.6269340 |
| C | 1.4952689  | 0.0000000  | -2.4412557 |
| C | 2.9141535  | 0.0000000  | -2.4308574 |
| C | 3.6823871  | 0.0000000  | -1.2802070 |
| C | 3.0552729  | 0.0000000  | 0.0000000  |
| C | 3.6823871  | 0.0000000  | 1.2802070  |
| C | 2.9141535  | 0.0000000  | 2.4308574  |
| C | 1.4952689  | 0.0000000  | 2.4412557  |
| C | 0.6831736  | 0.0000000  | 3.6269340  |
| C | -0.6831736 | 0.0000000  | 3.6269340  |
| H | -3.4136162 | 0.0000000  | 3.3952876  |
| H | -4.7662323 | 0.0000000  | 1.3719596  |
| H | -4.7662323 | 0.0000000  | -1.3719596 |
| H | -3.4136162 | 0.0000000  | -3.3952876 |
| H | -1.2162584 | 0.0000000  | -4.5755905 |
| H | 1.2162584  | 0.0000000  | -4.5755905 |
| H | 3.4136162  | 0.0000000  | -3.3952876 |
| H | 4.7662323  | 0.0000000  | -1.3719596 |
| H | 4.7662323  | 0.0000000  | 1.3719596  |
| H | 3.4136162  | 0.0000000  | 3.3952876  |
| H | 1.2162584  | 0.0000000  | 4.5755905  |
| H | -1.2162584 | 0.0000000  | 4.5755905  |
| H | 0.0000000  | 2.7334350  | 0.0000000  |
| H | 0.0000000  | 3.4754350  | 0.0000000  |
| H | 0.0000000  | -2.7334350 | 0.0000000  |
| H | 0.0000000  | -3.4754350 | 0.0000000  |

C-coro...2H<sub>2</sub>

|   |            |            |           |
|---|------------|------------|-----------|
| C | -1.2288787 | -0.7094934 | 0.0000000 |
| C | -1.2288787 | 0.7094934  | 0.0000000 |
| C | 0.0000000  | 1.4189869  | 0.0000000 |
| C | 1.2288787  | 0.7094934  | 0.0000000 |
| C | 1.2288787  | -0.7094934 | 0.0000000 |
| C | 0.0000000  | -1.4189869 | 0.0000000 |
| C | -2.4632768 | -1.4221735 | 0.0000000 |
| C | -2.4618561 | -2.8419276 | 0.0000000 |
| C | -1.2302535 | -3.5529937 | 0.0000000 |
| C | 0.0000000  | -2.8443471 | 0.0000000 |
| C | 1.2302535  | -3.5529937 | 0.0000000 |
| C | 2.4618561  | -2.8419276 | 0.0000000 |
| C | 2.4632768  | -1.4221735 | 0.0000000 |
| C | 3.6921095  | -0.7110661 | 0.0000000 |
| C | 3.6921095  | 0.7110661  | 0.0000000 |
| C | 2.4632768  | 1.4221735  | 0.0000000 |
| C | 2.4618561  | 2.8419276  | 0.0000000 |
| C | 1.2302535  | 3.5529937  | 0.0000000 |
| C | 0.0000000  | 2.8443471  | 0.0000000 |
| C | -1.2302535 | 3.5529937  | 0.0000000 |
| C | -2.4618561 | 2.8419276  | 0.0000000 |
| C | -2.4632768 | 1.4221735  | 0.0000000 |
| C | -3.6921095 | 0.7110661  | 0.0000000 |
| C | -3.6921095 | -0.7110661 | 0.0000000 |
| C | -3.7034231 | -3.5523899 | 0.0000000 |
| C | -1.2247484 | -4.9834534 | 0.0000000 |
| C | 1.2247484  | -4.9834534 | 0.0000000 |
| C | 3.7034231  | -3.5523899 | 0.0000000 |
| C | 4.9281715  | -1.4310635 | 0.0000000 |
| C | 4.9281715  | 1.4310635  | 0.0000000 |
| C | 3.7034231  | 3.5523899  | 0.0000000 |
| C | 1.2247484  | 4.9834534  | 0.0000000 |
| C | -1.2247484 | 4.9834534  | 0.0000000 |
| C | -3.7034231 | 3.5523899  | 0.0000000 |
| C | -4.9281715 | 1.4310635  | 0.0000000 |
| C | -4.9281715 | -1.4310635 | 0.0000000 |
| C | 0.0000000  | 5.6634589  | 0.0000000 |
| C | 2.4844343  | 5.6676017  | 0.0000000 |
| C | 3.6657635  | 4.9851840  | 0.0000000 |
| C | 4.9046993  | 2.8317695  | 0.0000000 |
| C | 6.1501578  | 0.6820177  | 0.0000000 |
| C | 6.1501578  | -0.6820177 | 0.0000000 |
| C | 4.9046993  | -2.8317695 | 0.0000000 |
| C | 3.6657635  | -4.9851840 | 0.0000000 |
| C | 2.4844343  | -5.6676017 | 0.0000000 |
| C | 0.0000000  | -5.6634589 | 0.0000000 |
| C | -2.4844343 | -5.6676017 | 0.0000000 |

|   |            |            |            |
|---|------------|------------|------------|
| C | -3.6657635 | -4.9851840 | 0.0000000  |
| C | -4.9046993 | -2.8317695 | 0.0000000  |
| C | -6.1501578 | -0.6820177 | 0.0000000  |
| C | -6.1501578 | 0.6820177  | 0.0000000  |
| C | -4.9046993 | 2.8317695  | 0.0000000  |
| C | -3.6657635 | 4.9851840  | 0.0000000  |
| C | -2.4844343 | 5.6676017  | 0.0000000  |
| H | 0.0000000  | 6.7508036  | 0.0000000  |
| H | 2.4839236  | 6.7531766  | 0.0000000  |
| H | 4.6064607  | 5.5277692  | 0.0000000  |
| H | 5.8463674  | 3.3754018  | 0.0000000  |
| H | 7.0903843  | 1.2254474  | 0.0000000  |
| H | 7.0903843  | -1.2254474 | 0.0000000  |
| H | 5.8463674  | -3.3754018 | 0.0000000  |
| H | 4.6064607  | -5.5277692 | 0.0000000  |
| H | 2.4839236  | -6.7531766 | 0.0000000  |
| H | 0.0000000  | -6.7508036 | 0.0000000  |
| H | -2.4839236 | -6.7531766 | 0.0000000  |
| H | -4.6064607 | -5.5277692 | 0.0000000  |
| H | -5.8463674 | -3.3754018 | 0.0000000  |
| H | -7.0903843 | -1.2254474 | 0.0000000  |
| H | -7.0903843 | 1.2254474  | 0.0000000  |
| H | -5.8463674 | 3.3754018  | 0.0000000  |
| H | -4.6064607 | 5.5277692  | 0.0000000  |
| H | -2.4839236 | 6.7531766  | 0.0000000  |
| H | 0.0000000  | 0.0000000  | 3.4710000  |
| H | 0.0000000  | 0.0000000  | 2.7290000  |
| H | 0.0000000  | 0.0000000  | -2.7290000 |
| H | 0.0000000  | 0.0000000  | -3.4710000 |

CoroB<sub>2</sub>Li<sub>2</sub>...2H<sub>2</sub>

|    |              |              |             |
|----|--------------|--------------|-------------|
| B  | -1.4901158   | 0.0000000    | 0.0000000   |
| C  | -0.7214808   | 0.0000000    | -1.3201461  |
| C  | 0.7214808    | 0.0000000    | -1.3201461  |
| B  | 1.4901158    | 0.0000000    | 0.0000000   |
| C  | 0.7214808    | 0.0000000    | 1.3201461   |
| C  | -0.7214808   | 0.0000000    | 1.3201461   |
| C  | -1.4590995   | 0.0000000    | 2.5442482   |
| C  | -2.8895583   | 0.0000000    | 2.4720350   |
| C  | -3.6194194   | 0.0000000    | 1.2822650   |
| C  | -2.9942746   | 0.0000000    | 0.0000000   |
| C  | -3.6194194   | 0.0000000    | -1.2822650  |
| C  | -2.8895583   | 0.0000000    | -2.4720350  |
| C  | -1.4590995   | 0.0000000    | -2.5442482  |
| C  | -0.6939531   | 0.0000000    | -3.7516112  |
| C  | 0.6939531    | 0.0000000    | -3.7516112  |
| C  | 1.4590995    | 0.0000000    | -2.5442482  |
| C  | 2.8895583    | 0.0000000    | -2.4720350  |
| C  | 3.6194194    | 0.0000000    | -1.2822650  |
| C  | 2.9942746    | 0.0000000    | 0.0000000   |
| C  | 3.6194194    | 0.0000000    | 1.2822650   |
| C  | 2.8895583    | 0.0000000    | 2.4720350   |
| C  | 1.4590995    | 0.0000000    | 2.5442482   |
| C  | 0.6939531    | 0.0000000    | 3.7516112   |
| C  | -0.6939531   | 0.0000000    | 3.7516112   |
| H  | -3.4411050   | 0.0000000    | 3.4100551   |
| H  | -4.7073598   | 0.0000000    | 1.3630236   |
| H  | -4.7073598   | 0.0000000    | -1.3630236  |
| H  | -3.4411050   | 0.0000000    | -3.4100551  |
| H  | -1.2161081   | 0.0000000    | -4.7060517  |
| H  | 1.2161081    | 0.0000000    | -4.7060517  |
| H  | 3.4411050    | 0.0000000    | -3.4100551  |
| H  | 4.7073598    | 0.0000000    | -1.3630236  |
| H  | 4.7073598    | 0.0000000    | 1.3630236   |
| H  | 3.4411050    | 0.0000000    | 3.4100551   |
| H  | 1.2161081    | 0.0000000    | 4.7060517   |
| H  | -1.2161081   | 0.0000000    | 4.7060517   |
| Li | 0.0000000    | 1.6308646    | 0.0000000   |
| Li | 0.0000000    | -1.6308646   | 0.0000000   |
| H  | 1.265355989  | -3.378466779 | 0.000000000 |
| H  | 1.755650811  | -2.821533221 | 0.000000000 |
| H  | -1.265355989 | 3.378466779  | 0.000000000 |
| H  | -1.755650811 | 2.821533221  | 0.000000000 |

CoroB<sub>2</sub>Li<sub>2</sub>...H<sub>2</sub>ss

|    |            |            |            |
|----|------------|------------|------------|
| B  | -1.2352545 | -0.7589914 | 0.2440153  |
| C  | 0.0835516  | -1.5055002 | 0.2068561  |
| C  | 1.2999472  | -0.7639774 | 0.2181541  |
| B  | 1.2352545  | 0.7589914  | 0.2440153  |
| C  | -0.0835516 | 1.5055002  | 0.2068561  |
| C  | -1.2999472 | 0.7639774  | 0.2181541  |
| C  | -2.5621581 | 1.4310699  | 0.2237340  |
| C  | -3.7604463 | 0.6197511  | 0.2268484  |
| C  | -3.7476387 | -0.7856602 | 0.2354274  |
| C  | -2.5287787 | -1.5429666 | 0.2126965  |
| C  | -2.4085636 | -2.9776999 | 0.1972006  |
| C  | -1.1796036 | -3.6107921 | 0.1935893  |
| C  | 0.0857498  | -2.9163067 | 0.1974978  |
| C  | 1.3589737  | -3.5708701 | 0.1988809  |
| C  | 2.5461200  | -2.8647988 | 0.2094780  |
| C  | 2.5621581  | -1.4310699 | 0.2237340  |
| C  | 3.7604463  | -0.6197511 | 0.2268484  |
| C  | 3.7476387  | 0.7856602  | 0.2354274  |
| C  | 2.5287787  | 1.5429666  | 0.2126965  |
| C  | 2.4085636  | 2.9776999  | 0.1972006  |
| C  | 1.1796036  | 3.6107921  | 0.1935893  |
| C  | -0.0857498 | 2.9163067  | 0.1974978  |
| C  | -1.3589737 | 3.5708701  | 0.1988809  |
| C  | -2.5461200 | 2.8647988  | 0.2094780  |
| H  | -4.7241842 | 1.1227568  | 0.2369714  |
| H  | -4.7156902 | -1.2884340 | 0.2460590  |
| H  | -3.3012306 | -3.6041263 | 0.2058115  |
| H  | -1.1627405 | -4.6984490 | 0.1935973  |
| H  | 1.3998458  | -4.6578941 | 0.1977927  |
| H  | 3.4865623  | -3.4109225 | 0.2199907  |
| H  | 4.7241842  | -1.1227568 | 0.2369714  |
| H  | 4.7156902  | 1.2884340  | 0.2460590  |
| H  | 3.3012306  | 3.6041263  | 0.2058115  |
| H  | 1.1627405  | 4.6984490  | 0.1935973  |
| H  | -1.3998458 | 4.6578941  | 0.1977927  |
| H  | -3.4865623 | 3.4109225  | 0.2199907  |
| Li | 2.5371572  | 0.0550250  | -1.4251734 |
| Li | -2.5371572 | -0.0550250 | -1.4251734 |
| H  | 0.0000000  | 0.0000000  | -2.3965165 |
| H  | 0.0000000  | 0.0000000  | -3.1385165 |

CoroB<sub>2</sub>Li<sub>2</sub>...H<sub>2</sub>os

|    |            |            |            |
|----|------------|------------|------------|
| B  | -1.2346188 | -0.7591096 | -0.0252158 |
| C  | 0.0838219  | -1.5047497 | -0.0699789 |
| C  | 1.2996830  | -0.7634572 | -0.0476769 |
| B  | 1.2346188  | 0.7591096  | -0.0252158 |
| C  | -0.0838219 | 1.5047497  | -0.0699789 |
| C  | -1.2996830 | 0.7634572  | -0.0476769 |
| C  | -2.5616433 | 1.4310103  | -0.0465761 |
| C  | -3.7600980 | 0.6202450  | -0.0469607 |
| C  | -3.7471284 | -0.7848341 | -0.0449410 |
| C  | -2.5281870 | -1.5416302 | -0.0667751 |
| C  | -2.4084166 | -2.9754876 | -0.1045707 |
| C  | -1.1799761 | -3.6091762 | -0.1128425 |
| C  | 0.0856989  | -2.9151894 | -0.0956446 |
| C  | 1.3587281  | -3.5699447 | -0.1012857 |
| C  | 2.5456375  | -2.8637667 | -0.0799923 |
| C  | 2.5616433  | -1.4310103 | -0.0465761 |
| C  | 3.7600980  | -0.6202450 | -0.0469607 |
| C  | 3.7471284  | 0.7848341  | -0.0449410 |
| C  | 2.5281870  | 1.5416302  | -0.0667751 |
| C  | 2.4084166  | 2.9754876  | -0.1045707 |
| C  | 1.1799761  | 3.6091762  | -0.1128425 |
| C  | -0.0856989 | 2.9151894  | -0.0956446 |
| C  | -1.3587281 | 3.5699447  | -0.1012857 |
| C  | -2.5456375 | 2.8637667  | -0.0799923 |
| H  | -4.7232960 | 1.1228692  | -0.0497581 |
| H  | -4.7143959 | -1.2873366 | -0.0507759 |
| H  | -3.3013141 | -3.6015506 | -0.1088096 |
| H  | -1.1636195 | -4.6967228 | -0.1291146 |
| H  | 1.3994879  | -4.6568924 | -0.1172680 |
| H  | 3.4860882  | -3.4099578 | -0.0760191 |
| H  | 4.7232960  | -1.1228692 | -0.0497581 |
| H  | 4.7143959  | 1.2873366  | -0.0507759 |
| H  | 3.3013141  | 3.6015506  | -0.1088096 |
| H  | 1.1636195  | 4.6967228  | -0.1291146 |
| H  | -1.3994879 | 4.6568924  | -0.1172680 |
| H  | -3.4860882 | 3.4099578  | -0.0760191 |
| Li | 2.5289649  | 0.0431623  | -1.6715860 |
| Li | -2.5289649 | -0.0431623 | -1.6715860 |
| H  | 0.0000000  | 0.0000000  | 2.7327751  |
| H  | 0.0000000  | 0.0000000  | 3.4747751  |
